# Supplementary material for: Antibacterial and Synergistic Effects of Shirazi Thyme (Zataria multiflora) Essential Oil Against Methicillin-Resistant Staphylococcus aureus
Source: Research Square preprint supplement (doi:10.21203/rs.3.rs-7411474/v1), 2025-09-05
Supplement: Supplementary file 1 [file 305bf8f3036e9f5cba3a4c52.docx]

**Table S1.** Primers were designed based on the target gene sequences For PCR amplification of the *mecA* gene.

| mecA gene | | |  |
| --- | --- | --- | --- |
| Primer Sequence | Forward Seq. | 5´-GTAGAAATGACTGAACGTCCGATAA-3´ | |
| Reverse Seq. | 5´-CCAATTCCACATTGTTTCGGTCTAA-3´ | |

**Table S2.** Antibacterial activity of *Z. multiflora* Essential Oil

| *****Zataria multiflora* essential oil (****mg.ml-1) | *S. aureus* |
| --- | --- |
| 3.125 | MIC (ATCC 25923) |
| 6.25 | MBC (ATCC 25923) |
| 6.25 | MIC (MDR) |
| 6.25 | MBC (MDR) |

**Table S3.** GC-MS analysis of *Z. multiflora* essential oil

| Name of the ligand | Pubchem ID | Binding Free Energy (kcal.mol-1) | pKi | Ligand Efficiency (kcal/mol/non-H atom) |
| --- | --- | --- | --- | --- |
| Cefoxitin | 441199 | -8 | 5.87 | 0.2857 |
| Cefepime | 5479537 | -7.5 | 5.5 | 0.2344 |
| Meropenem | 441130 | -7.5 | 5.5 | 0.2885 |
| Imipenem | 104838 | -6.8 | 4.99 | 0.34 |
| (+) Spathulenol | 13854255 | -6.7 | 4.91 | 0.4188 |
| Isospathulenol | 14038848 | -6.7 | 4.91 | 0.4188 |
| Alpha-trans-Bergamotene | 482043031 | -6.7 | 4.91 | 0.4467 |
| (+)-Aromadendrene | 11095734 | -6.6 | 4.84 | 0.44 |
| Caryophyllene oxide | 1742210 | -6.6 | 4.84 | 0.4125 |
| Trans-Caryophyllene | 5281515 | -6.5 | 4.77 | 0.4333 |
| Alpha-Humulene | 5281520 | -6.3 | 4.62 | 0.42 |
| (-)-Alloaromadendrene | 10899740 | -6.2 | 4.55 | 0.4133 |
| Calarene | 28481 | -6.1 | 4.47 | 0.4067 |
| Beta-Bisabolene | 10104370 | -6.1 | 4.47 | 0.4067 |
| Carvacryl acetate | 80792 | -5.8 | 4.25 | 0.4143 |
| Alpha-Bergamotene | 86608 | -5.8 | 4.25 | 0.3867 |
| α-Curcumene | 92139 | -5.8 | 4.25 | 0.3867 |
| Thymyl acetate | 68252 | -5.7 | 4.18 | 0.4071 |
| Alpha-bornyl acetate | 131752808 | -5.6 | 4.11 | 0.4 |
| Carvacrol methyl ether | 80790 | -5.5 | 4.03 | 0.4583 |
| Carvacrol | 10364 | -5.4 | 3.96 | 0.4909 |
| Beta-Sesquiphellandrene | 519764 | -5.4 | 3.96 | 0.36 |
| Linalool oxide cis | 6432254 | -5.3 | 3.89 | 0.4417 |
| 1,8-Cineole | 2758 | -5.1 | 3.74 | 0.4636 |
| Borneol | 64685 | -5.1 | 3.74 | 0.4636 |
| Methyl thymyl ether | 14104 | -5.1 | 3.74 | 0.425 |
| Thymol | 6989 | -5.1 | 3.74 | 0.4636 |
| Cis-linalol oxide | 529304 | -5.1 | 3.74 | 0.425 |
| Alpha-Terpinolene | 11463 | -5 | 3.67 | 0.5 |
| o-Cymene | 10703 | -5 | 3.67 | 0.5 |
| 4-Terpineol | 11230 | -5 | 3.67 | 0.4545 |
| Cis-sabinene hydrate | 62367 | -5 | 3.67 | 0.4545 |
| Alpha-pinene | 6654 | -4.9 | 3.59 | 0.49 |
| l-Phellandrene | 443160 | -4.9 | 3.59 | 0.49 |
| Gamma-Terpinene | 7461 | -4.9 | 3.59 | 0.49 |
| Alpha-Terpinene | 7462 | -4.9 | 3.59 | 0.49 |
| Camphene | 6616 | -4.8 | 3.52 | 0.48 |
| Alpha-Thujene | 17868 | -4.8 | 3.52 | 0.48 |
| dl-Limonene | 22311 | -4.8 | 3.52 | 0.48 |
| (+-)-Linalool | 6549 | -4.7 | 3.45 | 0.4273 |
| Beta-Myrcene | 31253 | -4.1 | 3.01 | 0.41 |
| 3-Octanone | 246728 | -4 | 2.93 | 0.4444 |

**Table S4.** Pharmacokinetic properties of the antibiotics cefepime, Spathulenol (Pubchem ID: 13854255), Isospathulenol (Pubchem ID:14038848), Aromadendrene (Pubchem ID: 11095734)

|  | Cefepime | Spathulenol | Isospathulenol | Aromadendrene |
| --- | --- | --- | --- | --- |
| MW | 480.56 | 220.35 | 220.35 | 204.35 |
| Heavy atoms | 32 | 16 | 16 | 15 |
| ESOL Solubility (mg/ml) | 5.27E+00 | 1.51E-01 | 3.06E-01 | 1.72E-02 |
| ESOL Class | Very soluble | Soluble | Soluble | Moderately soluble |
| Silicos-IT class | Soluble | Soluble | Soluble | Soluble |
| GI absorption | Low | High | High | Low |
| BBB permeant | No | Yes | Yes | Yes |
| Pgp substrate | No | No | No | No |
| CYP1A2 inhibitor | No | No | No | Yes |
| CYP2C19 inhibitor | No | Yes | No | Yes |
| CYP2C9 inhibitor | No | No | No | Yes |
| CYP2D6 inhibitor | No | No | No | No |
| CYP3A4 inhibitor | No | No | No | No |
| Bioavailability Score | 0.55 | 0.55 | 0.55 | 0.55 |
| PAINS #alerts | 0 | 0 | 0 | 0 |
| Brenk #alerts | 3 | 1 | 1 | 1 |
| Synthetic Accessibility | 5.09 | 3.78 | 4.35 | 3.7 |
