# Supplementary figures and images for: Antibacterial and Synergistic Effects of Shirazi Thyme (Zataria multiflora) Essential Oil Against Methicillin-Resistant Staphylococcus aureus
Source: Research Square preprint supplement (doi:10.21203/rs.3.rs-7411474/v1), 2025-09-05

**
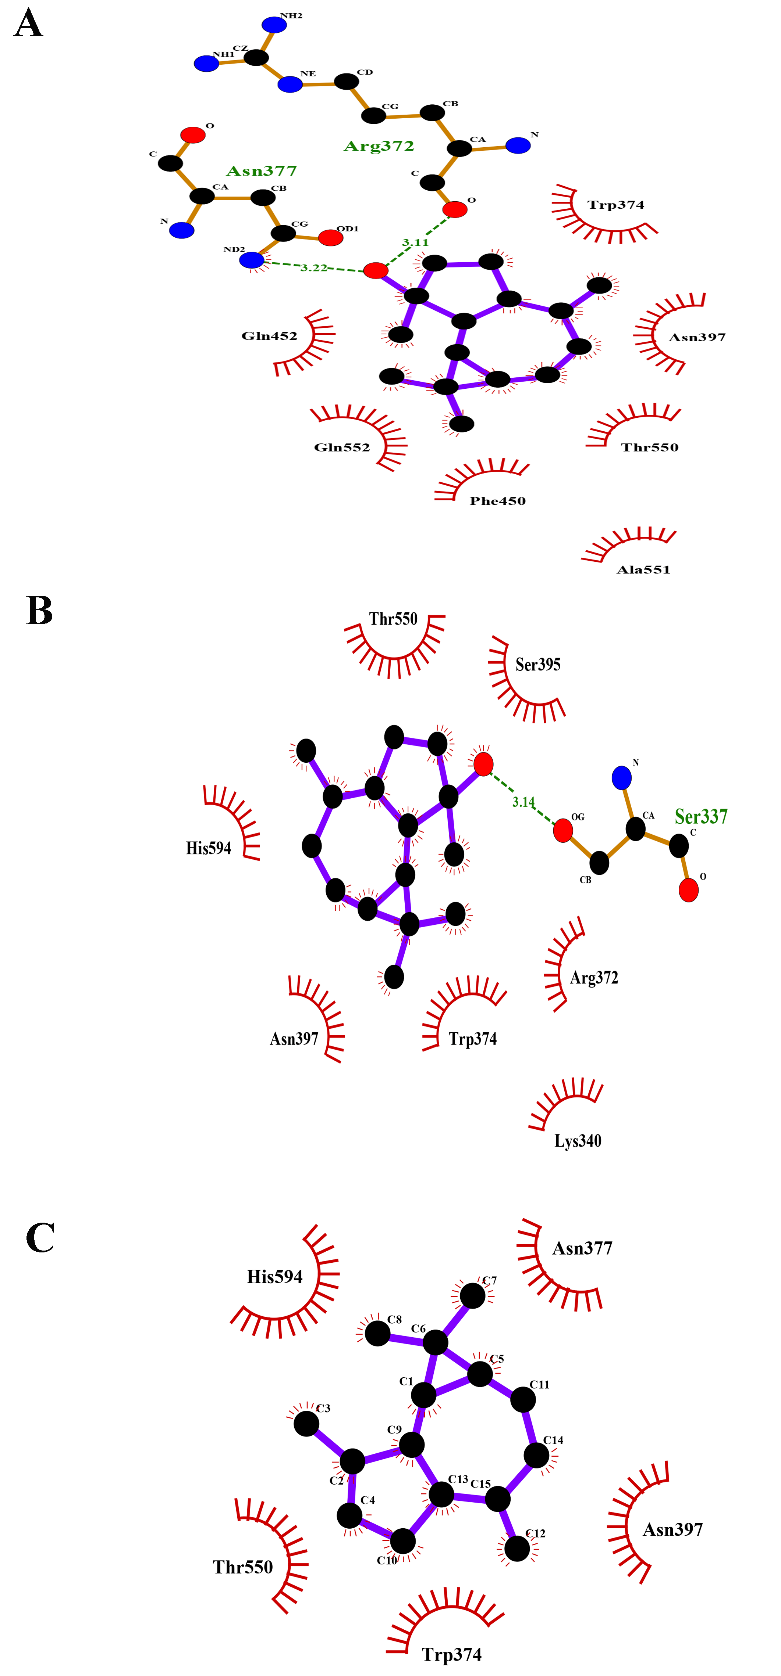
Figure S1**

Supplement: Supplementary file 2 [file 6bc8a4d8a251570927fd51cd.docx]
